# Supplementary material for: Genomic Alterations and Tumor Mutation Burden in Merkel Cell Carcinoma
Source: PubMed Central journal article supplement (PMC9856969; doi:10.1001/jamanetworkopen.2022.49674), 2023-01-05
Supplement: jamanetwopen-e2249674-s001.pdf [file jamanetwopen-e2249674-s001.pdf]

## Supplemental Online Content

Brazel D, Kumar P, Doan H, et al. Genomic alterations and tumor mutation burden in Merkel cell carcinoma. *JAMA Netw Open*. 2023;6(1):e2249674.  
doi:10.1001/jamanetworkopen.2022.49674

**eTable 1.** OncoKB Therapeutic Levels of Evidence

**eFigure.** Percentage of Patients With Each of the 10 TCGA PanCancer Pathways Altered

**eTable 2.** Summary of Ongoing Published and Registered Trials From NCT.gov Utilizing Targeted Therapy Clinical Trials in Merkel Cell Carcinoma

**eReferences**

This supplemental material has been provided by the authors to give readers additional information about their work.

**eTable 1:** OncoKB Therapeutic Levels of Evidence

| Level of Evidence | Definition                                                                                                                                                       |
|-------------------|------------------------------------------------------------------------------------------------------------------------------------------------------------------|
| L1                | There is an FDA-biomarker that predicts a response to an FDA-approved drug for this indication                                                                   |
| L2                | Indicates a standard care biomarker recommended by the NCCN or other professional guidelines that predict a response to an FDA-approved drug for this indication |
| L3A               | Indicates compelling clinical evidence supports the biomarker as being predictive of response to a drug in this indication                                       |
| L3A               | Indicates a standard care or investigational biomarker predictive of response to an FDA-approved or investigational drug in another indication                   |
| L4                | Indicates compelling biological evidence supports the biomarker as being predictive of response to a drug                                                        |

Adapted from [oncokb.com](http://oncokb.com)

**eFigure:** Percentage of Patients With Each of the 10 TCGA PanCancer Pathways Altered

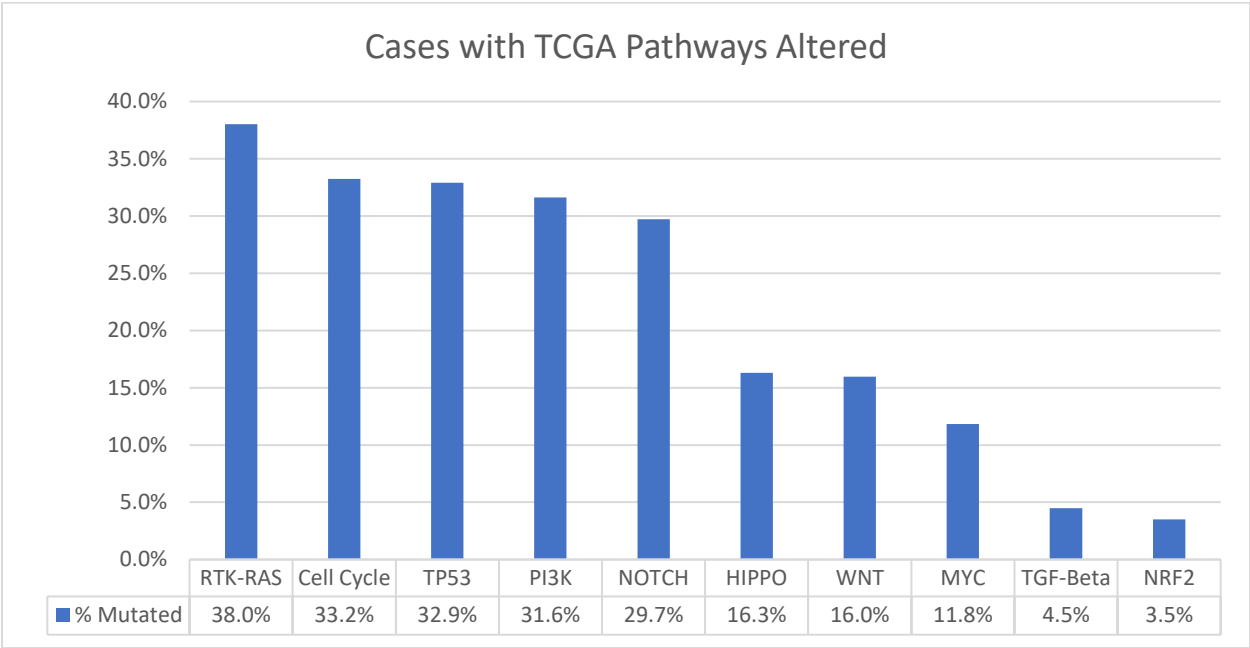

**eTable 2:** Summary of Ongoing Published and Registered Trials From NCT.gov Utilizing Targeted Therapy Clinical Trials in Merkel Cell Carcinoma

| NCT                    | Phase | Cancer Types                            | Drug(s)                    | Targeted Therapy Mechanism                       | ORR        | Status                 | Site                                 | Ref            |
|------------------------|-------|-----------------------------------------|----------------------------|--------------------------------------------------|------------|------------------------|--------------------------------------|----------------|
| NCT03787602            | 1b/2  | P53 Wild Type PD-1 refractory MCC       | Navtemadlin (KRT-232)      | MDM2 inhibitor                                   | 33% (3/9)  | Recruiting             | Multiple Institutions, US            | <sup>1,2</sup> |
| NCT02036476            | 2     | Recurrent or Metastatic MCC             | Cabozatanib                | Multiple receptor TKI                            | 0% (0/8)   | Active, not recruiting | Dana Farber Cancer Institute         | <sup>3</sup>   |
| NCT10125877            | 2     | Metastatic MCC                          | Pazopanib                  | Multiple receptor TKI                            | 19% (3/16) | Completed              | Multiple institutions, international | <sup>4</sup>   |
| NCT02514824            | 1/2   | Recurrent or Metastatic MCC             | MLN0128                    | mTOR inhibitor                                   | NYR        | Closed                 | Dana Farber Cancer Institute         |                |
| NCT04393753 (MERKLIN2) | 2     | PD-1 refractory MCC                     | Avelumab + Domatinostat    | Histone deacetylase inhibitor                    | NYR        | Active, not recruiting | Multiple institutions, international |                |
| NCT04869137            | 2     | Neoadjuvant treatment in Resectable MCC | Lenvatinib + Pembrolizumab | Multiple receptor TKI                            | NYR        | Recruiting             | Moffitt Cancer Center                |                |
| NCT00068783 (S0331)    | 2     | Unresectable or Metastatic MCC          | Imatinib                   | BCR/ABL TKI                                      | 4% (1/23)  | Completed              | Southwest Oncology Group             | <sup>5</sup>   |
| NCT00079131            | 2     | Metastatic or Recurrent MCC             | Oblimersen                 | Bcl-2 antisense phosphorothioate oligonucleotide | NYR        | Completed              | Memorial Sloan-Kettering             |                |

ORR= Objective Response Rate (complete response + partial responses)

NYR= Not yet reported

TKI= Tyrosine Kinase Inhibitor

## **eReferences**

1. Wong MKK, Kelly CM, Burgess MA, et al. KRT-232, a first-in-class, murine double minute 2 inhibitor (MDM2i), for TP53 wild-type (p53WT) Merkel cell carcinoma (MCC) after anti-PD-1/L1 immunotherapy. *Journal of Clinical Oncology*. 2020;38(15\_suppl):10072-10072. doi:10.1200/JCO.2020.38.15\_suppl.10072
2. Wong MKK, Burgess MA, Chandra S, et al. Navtemadlin (KRT-232) activity after failure of anti-PD-1/L1 therapy in patients (pts) with TP53WT Merkel cell carcinoma (MCC). *Journal of Clinical Oncology*. 2022;40(16\_suppl):9506-9506. doi:10.1200/JCO.2022.40.16\_suppl.9506
3. Rabinowits G, Lezcano C, Catalano PJ, et al. Cabozantinib in Patients with Advanced Merkel Cell Carcinoma. *Oncologist*. Jul 2018;23(7):814-821. doi:10.1634/theoncologist.2017-0552
4. Nathan PD, Gaunt P, Wheatley K, et al. UKMCC-01: A phase II study of pazopanib (PAZ) in metastatic Merkel cell carcinoma. *Journal of Clinical Oncology*. 2016;34(15\_suppl):9542-9542. doi:10.1200/JCO.2016.34.15\_suppl.9542
5. Samlowski WE, Moon J, Tuthill RJ, et al. A phase II trial of imatinib mesylate in merkel cell carcinoma (neuroendocrine carcinoma of the skin): A Southwest Oncology Group study (S0331). *Am J Clin Oncol*. Oct 2010;33(5):495-9. doi:10.1097/COC.0b013e3181b9cf04
