# Supplementary material for: Genomic Alterations and Tumor Mutation Burden in Merkel Cell Carcinoma
Source: PubMed Central journal article supplement (PMC9856969; doi:10.1001/jamanetworkopen.2022.49674), 2023-01-05
Supplement: jamanetwopen-e2249674-s002.pdf [file jamanetwopen-e2249674-s002.pdf]

## Data Sharing Statement

Brazel. Genomic Alterations and Tumor Mutation Burden in Merkel Cell Carcinoma. *JAMA Netw Open*. Published January 05, 2023. doi:10.1001/jamanetworkopen.2022.49674

### Data

**Data available:** Yes

**Data types:** Deidentified participant data

**How to access data:** <https://genie.cbioportal.org/login.jsp>

**When available:** With publication

### Supporting Documents

**Document types:** None

### Additional Information

**Who can access the data:** anyone requesting the data from cbioportal

**Types of analyses:** for any purpose

**Mechanisms of data availability:** access by investigator
